# Supplementary material for: Clinical efficacy and safety of anti-PD-1/PD-L1 inhibitors for the treatment of advanced or metastatic cancer: a systematic review and meta-analysis
Source: PubMed Central journal article supplement (PMC7005709; doi:10.1038/s41598-020-58674-4), 2020-02-07

## SUPPLEMENTARY MATERIAL

### **Clinical efficacy and safety of anti-PD-1/PD-L1 inhibitors for the treatment of advanced or metastatic cancer: a systematic review and meta-analysis**

Leitao Sun<sup>1,3\*</sup>, Leyin Zhang<sup>1\*</sup>, Jieru Yu<sup>2</sup>, Yinan Zhang<sup>1</sup>, Xi Pang<sup>1</sup>, Chenghao Ma<sup>1</sup>,  
Minhe Shen<sup>3</sup>, Shanming Ruan<sup>3#</sup>, Harpreet S Wasan<sup>4</sup>, Shengliang Qiu<sup>5#</sup>

\*These authors contributed equally to this work.

#Corresponding author: Shengliang Qiu, The First Affiliated Hospital of Zhejiang Chinese Medical University, Hangzhou 310053, Zhejiang, China. E-mail: shengliang.qiu@zcmu.edu.cn.

## **Supplementary Method**

**Supplementary Method 1** - Search strategy for PubMed

**Supplementary Method 2** - Risk of Methodological Bias Assessment

## **Supplementary Table**

**Supplementary Table 1** - Further Characteristics of the included trial

**Supplementary Table 2** - Subgroup analysis of OS

**Supplementary Table 3** - Subgroup analysis of PFS

## **Supplementary Figure**

**Supplementary Figure 1** - Risk of bias graph

**Supplementary Figure 2** - Risk of bias summary

**Supplementary Figure 3** - PD-L1 biomarker analysis of OS

**Supplementary Figure 4** - PD-L1 biomarker analysis of PFS

**Supplementary Figure 5** - ORR analysis of RR and 95%CI based on anti-PD-1/PD-L1 inhibitor used and target spot

**Supplementary Figure 6** - ORR analysis of meta-regression analysis based on regimen used and target spot

**Supplementary Figure 7** - Sensitivity analysis of OS and PFS

**Supplementary Figure 8** - Funnel plot of OS and PFS

**Supplementary Figure 9** - Egger's test of OS and PFS

**Supplementary Figure 10** - Begg's test of OS and PFS



trial[Publication Type]) OR randomized[Title/Abstract]) OR placebo[Title/Abstract])  
OR randomly[Title/Abstract]) OR trial[Title/Abstract]) OR groups[Title/Abstract]))  
NOT ((animals[MeSH Terms]) NOT ((humans[MeSH Terms]) AND animals[MeSH  
Terms])))

## **Supplementary Method 2 - Risk of Methodological Bias Assessment**

The Cochrane evaluation handbook of RCTs, includes selection bias (random sequence generation and allocation concealment), performance bias (blinding of participants and personnel), detection bias (blinding of outcome assessment), attrition bias (incomplete outcome data), reporting bias (selective reporting) and other bias, was applied to evaluate the quality of all studies. Two independent investigators (CHM and XP) subjectively examined each trial and scored it as high, low, or unclear risk of bias. All disagreements about bias assessment were resolved through discussion and consensus.

**Supplementary Table 1- Further Characteristics of the included trial**

| Author, year      | Stage     | No. of Male | No. of Female | Median age, years | Follow-up, months            | No. of Patients | Median PFS, months | Median OS, months |
|-------------------|-----------|-------------|---------------|-------------------|------------------------------|-----------------|--------------------|-------------------|
| Horn 2018         | Extensive | 261 (65%)   | 142 (35%)     | 64 (26-90)        | 13.9 months                  | 201             | 5.2 (4.4-5.6)      | 12.3 (10.8-15.9)  |
|                   |           |             |               |                   |                              | 202             | 4.3 (4.2-4.5)      | 10.3 (9.3-11.3)   |
| Cohen 2018        | II/III/IV | 412 (83%)   | 83 (17%)      | 60 (54-66)        | 7.5 months vs 7.1 months     | 247             | 2.1 (2.1-2.3)      | 8.4 (6.4-9.4)     |
|                   |           |             |               |                   |                              | 248             | 2.3 (2.1-2.8)      | 6.9 (5.9-8.0)     |
| Schmid 2018       | IV        | 4 (0.4%)    | 898 (99.6%)   | NA (20-86)        | 12.9 months                  | 451             | 7.2 (5.6-7.5)      | 21.3 (17.3-23.4)  |
| Powles 2018       | IV        | 718 (77%)   | 213 (23%)     | 67 (31-88)        | 17.3 months                  | 451             | 5.5 (5.3-5.6)      | 17.6 (15.9-20.0)  |
|                   |           |             |               |                   |                              | 464             | 2.1 (2.1-2.2)      | 8.6 (7.8-9.6)     |
| Paz-Ares 2018     | IV        | 455 (81%)   | 104 (19%)     | 65 (29-88)        | 7.8 months                   | 464             | 4.0 (3.4-4.2)      | 8.0 (7.2-8.6)     |
|                   |           |             |               |                   |                              | 278             | 6.4 (6.2-8.3)      | 15.9 (13.2-NA)    |
| Larkin 2018       | IIIC/IV   | 261 (64%)   | 144 (36%)     | NA (23-88)        | approximately 2 years        | 281             | 4.8 (4.3-5.7)      | 11.3 (9.5-14.8)   |
|                   |           |             |               |                   |                              | 272             | 3.1 (2.3-3.5)      | 15.7 (12.9-19.9)  |
| Herbst 2016       | IV        | 634 (61%)   | 399 (39%)     | NA (56-69)        | 13.1 months                  | 133             | 3.7 (2.3-5.3)      | 14.4 (11.7-18.2)  |
|                   |           |             |               |                   |                              | 344             | 3.9 (3.1-4.1)      | 10.4 (9.4-11.9)   |
| Gandhi 2018       | IV        | 363 (59%)   | 253 (41%)     | NA (34-84)        | 10.5 months                  | 346             | 4.0 (2.7-4.3)      | 12.7 (10.0-17.3)  |
|                   |           |             |               |                   |                              | 343             | 4.0 (3.1-4.2)      | 8.5 (7.5-9.8)     |
| Fehrenbacher 2018 | IV        | 758 (62%)   | 467 (38%)     | NA (25-85)        | 26months                     | 410             | 8.8 (7.6-9.2)      | NA                |
|                   |           |             |               |                   |                              | 206             | 4.9 (4.7-5.5)      | 11.3 (8.7-15.1)   |
| Barlesi 2018      | IIIB/ IV  | 542 (68%)   | 250 (32%)     | NA (57-69)        | 18.3 months                  | 613             | 2.7 (2.4-2.9)      | 13.3 (11.3-14.9)  |
|                   |           |             |               |                   |                              | 612             | 3.8 (3.3-4.1)      | 9.5 (8.6-10.9)    |
| Antonia 2018      | III       | 500 (70%)   | 213 (30%)     | 64 (23-90)        | 25.2 months                  | 396             | 2.8 (2.7-3.5)      | 10.5 (12.9-19.9)  |
|                   |           |             |               |                   |                              | 396             | 4.2 (3.3-5.2)      | 9.9 (8.1-11.8)    |
| Reck 2016         | IV        | 187 (61%)   | 118 (39%)     | NA (33-90)        | 11.2 months                  | 476             | 17.2 (13.1-23.9)   | NA (34.7-NA)      |
|                   |           |             |               |                   |                              | 237             | 5.6 (4.6-7.7)      | 28.7 (22.9-NA)    |
| Kang 2017         | IV        | 348 (71%)   | 145 (29%)     | NA (53-69)        | 8.87 months vs 8.59 months   | 154             | 10.3 (6.7-NA)      | NA                |
|                   |           |             |               |                   |                              | 151             | 6.0 (4.2-6.2)      | NA                |
| Carbone 2017      | IV        | 332 (61%)   | 209 (39%)     | 64 (29-89)        | 13.5months                   | 330             | 1.61 (1.54-2.30)   | 5.26 (4.60-6.37)  |
|                   |           |             |               |                   |                              | 163             | 1.45 (1.45-1.54)   | 4.14 (3.42-4.86)  |
| Bellmunt 2017     | IV        | 402 (74%)   | 140 (26%)     | NA (26-88)        | 14.1 months                  | 271             | 4.2 (3.1-5.5)      | 13.7 (11.8-15.4)  |
|                   |           |             |               |                   |                              | 270             | 5.8 (5.4-6.9)      | 13.8 (11.0-17.0)  |
| Borghaei 2015     | IIIB/IV   | 319 (55%)   | 263 (45%)     | 62 (21-85)        | 17.2 months+                 | 270             | 2.1 (2.0-2.2)      | 10.3 (8.0-11.8)   |
|                   |           |             |               |                   |                              | 272             | 3.3 (2.3-3.5)      | 7.4 (6.1-8.3)     |
| Brahmer 2015      | IIIB/IV   | 208 (76%)   | 64 (24%)      | 63 (39-85)        | 11 months +                  | 292             | 2.3 (2.2-3.3)      | 12.2 (9.7-15.0)   |
|                   |           |             |               |                   |                              | 290             | 4.2 (3.5-4.9)      | 9.4 (8.1-10.7)    |
| Motzer 2015       | IV        | 619 (75%)   | 202 (25%)     | 62 (18-88)        | 14 months +                  | 135             | 3.5 (2.1-4.9)      | 9.2 (7.3-13.3)    |
|                   |           |             |               |                   |                              | 137             | 2.8 (2.1-3.5)      | 6.0 (5.1-7.3)     |
| Fehrenbacher 2016 | IV        | 169 (59%)   | 118 (41%)     | 62 (36-84)        | 13 months +                  | 410             | 4.6 (3.7-5.4)      | 25.0 (21.8-NA)    |
|                   |           |             |               |                   |                              | 411             | 4.4 (3.7-5.5)      | 19.6 (17.6-23.1)  |
| Ferris 2016       | IV        | 300 (83%)   | 61 (17%)      | 60 (28-83)        | 5.1 months                   | 144             | 2.7 (2.0-4.1)      | 12.6 (9.7-16.4)   |
|                   |           |             |               |                   |                              | 143             | 3.0 (2.8-4.1)      | 9.7 (8.6-12.0)    |
| Socinski 2018     | IV        | 479 (60%)   | 321 (40%)     | 63 (31-90)        | 9.5 months+                  | 240             | 2.0 (1.9-2.1)      | 7.5 (5.5-9.1)     |
|                   |           |             |               |                   |                              | 121             | 2.3 (1.9-3.1)      | 5.1 (4.0-6.0)     |
| Ascierto 2018     | III/IV    | 246 (59%)   | 172 (41%)     | NA (18-87)        | 38.4 months+ vs 38.5 months+ | 400             | 8.3 (7.9-9.8)      | NA                |
|                   |           |             |               |                   |                              | 400             | 6.8 (6.0-7.1)      | NA                |
| Bang 2018         | IV        | 267 (72%)   | 104 (28%)     | NA (18-86)        | 10.6 months                  | 210             | 5.1 (3.5-12.2)     | 37.5 (25.5-NA)    |
|                   |           |             |               |                   |                              | 208             | 2.2 (2.1-2.5)      | 11.2 (9.6-13.0)   |
| Mateos 2019       | III       | 155 (62%)   | 94 (38%)      | NA (60-74)        | 8.1 months                   | 185             | 4.6 (3.6-5.7)      | NA                |
|                   |           |             |               |                   |                              | 186             | 5.0 (4.5-6.3)      | NA                |
| Usmani 2019       | III       | 151 (50%)   | 150( 50%)     | 74 (70-79)        | 6.6 months                   | 125             | 5.6 (3.7-7.5)      | NA (12.9-NA)      |
|                   |           |             |               |                   |                              | 124             | 8.4 (5.9-NA)       | 15.2 (12.7-NA)    |
| Borghaei 2019     | IIIB/IV   | NA          | NA            | NA                | 23.9 months                  | 151             | NA                 | NA                |
|                   |           |             |               |                   |                              | 150             | NA                 | NA                |
| Eng 2019          | IV        | 217 (60%)   | 146 (40%)     | NA (51-67)        | 7.3 months                   | 60              | 24.0 (8.5-NA)      | NA (24.5-NA)      |
|                   |           |             |               |                   |                              | 63              | 9.3 (6.2-14.9)     | 21.1 (14.9-NA)    |
| Fradet 2019       | IV        | 402 (74%)   | 140 (26%)     | NA (26-88)        | 27.7 months                  | 183             | 1.91 (1.87-1.97)   | 8.87 (7.00-10.61) |
|                   |           |             |               |                   |                              | 90              | 1.94 (1.91-2.10)   | 7.10 (6.05-10.05) |
| Hamid 2017        | IV        | 327 (61%)   | 213 (39%)     | NA (15-89)        | 28 months                    | 90              | 2.00 (1.87-3.61)   | 8.51 (6.41-10.71) |
|                   |           |             |               |                   |                              | 90              | 2.1 (2.0-2.2)      | 10.1 (8.0-12.3)   |
| Mok 2019          | IV        | 902 (71%)   | 372 (29%)     | 63 (59-69)        | 12.8 months                  | 266             | 3.3 (2.4-3.6)      | 7.3 (6.1-8.1)     |
|                   |           |             |               |                   |                              | 255             | NA                 | 13.4 (11.0-16.4)  |
| Motzer 2019       | IV        | 660 (74%)   | 226 (25%)     | NA                | 10.8 months vs 8.6 months    | 180             | NA                 | 14.7 (11.3-19.5)  |
|                   |           |             |               |                   |                              | 181             | NA                 | 11.0 (8.9-13.8)   |
| Weber 2015        | IV        | 261 (64%)   | 144 (36%)     | NA (23-88)        | 8.4 months                   | 179             | NA                 | NA                |
|                   |           |             |               |                   |                              | 133             | 7.1 (5.9-9.0)      | NA                |
| West 2019         | IV        | 415 (57%)   | 308 (43%)     | NA (18-86)        | 18.5 months vs 19.2 months   | 637             | 6.4 (96.1-6.9)     | NA                |
|                   |           |             |               |                   |                              | 483             | 13.8 (11.1-NA)     | NA                |
| Brian 2019        | IV        | 669 (73%)   | 246 (27%)     | NA (54069)        | 15 months                    | 424             | 8.4 (6.9-11.1)     | NA                |
|                   |           |             |               |                   |                              | 272             | 4.7 (2.3-6.5)      | NA                |
| Rini 2019         | IV        | 628(73%)    | 233 (27%)     | NA (26-90)        | 12.8 months                  | 133             | 4.2 (2.1-6.3)      | NA                |
|                   |           |             |               |                   |                              | 483             | 7.0 (6.3-7.3)      | 18.1 (15.3-20.8)  |
|                   |           |             |               |                   |                              | 240             | 5.6 (4.5-5.9)      | 13.9 (12.0-18.2)  |
|                   |           |             |               |                   |                              | 454             | 11.2 (9.6-13.3)    | 33.6 (29.0-NA)    |
|                   |           |             |               |                   |                              | 461             | 8.4 (7.5-9.7)      | 34.9 (27.8-NA)    |
|                   |           |             |               |                   |                              | 432             | 15.1 (12.6-24.9)   | NA                |
|                   |           |             |               |                   |                              | 429             | 11.1 (8.7-12.5)    | NA                |

**Abbreviations:** †Represents minimum follow-up time between the start of the study (the first visit of the first enrolled patient) and the end of the study (the last visit of the last enrolled patient).

**Supplementary Table 2- Subgroup analysis: Subgroup analysis of pooled hazard ratios and 95%CI of OS for patients with advanced or metastatic cancer assigned to intervention treatment, compared with those assigned to control treatment.**

| Analysis                          | N  | Random-effects model |        | Fixed-effects model |        | Heterogeneity  |        |
|-----------------------------------|----|----------------------|--------|---------------------|--------|----------------|--------|
|                                   |    | HR (95% CI)          | P      | HR (95% CI)         | P      | I <sup>2</sup> | Ph     |
| <b>Histotype</b>                  | 34 | 0.76 (0.71, 0.82)    | ≤0.001 | 0.77 (0.74, 0.80)   | ≤0.001 | 68.2%          | ≤0.001 |
| HNC                               | 2  | 0.77 (0.65, 0.91)    | 0.003  | 0.77 (0.65, 0.91)   | 0.003  | 0.0%           | 0.488  |
| GC/GEJC                           | 2  | 0.83 (0.48, 1.44)    | 0.509  | 0.82 (0.71, 0.96)   | 0.013  | 92.1%          | ≤0.001 |
| UC                                | 3  | 0.77 (0.68, 0.87)    | ≤0.001 | 0.78 (0.70, 0.86)   | ≤0.001 | 26.0%          | 0.256  |
| NSCLC                             | 15 | 0.72 (0.66, 0.80)    | ≤0.001 | 0.75 (0.71, 0.80)   | ≤0.001 | 63.1%          | ≤0.001 |
| MM                                | 2  | 1.75 (1.10, 2.78)    | 0.018  | 1.75 (1.10, 2.78)   | 0.018  | 0.0%           | 0.621  |
| Mm                                | 4  | 0.69 (0.50, 0.96)    | 0.029  | 0.68 (0.59, 0.78)   | ≤0.001 | 82.0%          | ≤0.001 |
| RCC                               | 4  | 0.74 (0.59, 0.93)    | 0.010  | 0.78 (0.68, 0.88)   | ≤0.001 | 64.0%          | 0.040  |
| CRC                               | 2  | 1.08 (0.85, 1.37)    | 0.533  | 1.08 (0.85, 1.37)   | 0.533  | 0.0%           | 0.479  |
| <b>Regimen</b>                    | 36 | 0.76 (0.71, 0.82)    | ≤0.001 | 0.77 (0.74, 0.80)   | ≤0.001 | 66.7%          | ≤0.001 |
| combination therapy               | 12 | 0.78 (0.66, 0.91)    | 0.002  | 0.77 (0.71, 0.83)   | ≤0.001 | 71.8%          | ≤0.001 |
| Monotherapy                       | 24 | 0.76 (0.70, 0.82)    | ≤0.001 | 0.77 (0.74, 0.81)   | ≤0.001 | 65.2%          | ≤0.001 |
| <b>Combination Drug</b>           | 12 | 0.78 (0.66, 0.91)    | 0.002  | 0.77 (0.71, 0.83)   | ≤0.001 | 71.8%          | ≤0.001 |
| Chemotherapy                      | 6  | 0.68 (0.57, 0.81)    | ≤0.001 | 0.70 (0.64, 0.78)   | ≤0.001 | 61.9%          | 0.022  |
| Targeted therapy                  | 6  | 0.94 (0.71, 1.26)    | 0.694  | 0.88 (0.77, 1.01)   | 0.066  | 73.7%          | 0.002  |
| <b>Treatment in control group</b> | 34 | 0.76 (0.71, 0.82)    | ≤0.001 | 0.77 (0.74, 0.80)   | ≤0.001 | 68.5%          | ≤0.001 |
| Chemotherapy                      | 24 | 0.74 (0.68, 0.80)    | ≤0.001 | 0.76 (0.73, 0.80)   | ≤0.001 | 68.0%          | ≤0.001 |
| Placebo                           | 2  | 0.64 (0.53, 0.77)    | ≤0.001 | 0.64 (0.53, 0.77)   | ≤0.001 | 0.0%           | 0.729  |
| Biologics                         | 8  | 0.93 (0.74, 1.16)    | 0.496  | 0.87 (0.78, 0.98)   | 0.017  | 70.7%          | ≤0.001 |
| <b>Age</b>                        | 20 | 0.76 (0.70, 0.82)    | ≤0.001 | 0.77 (0.73, 0.81)   | ≤0.001 | 55.4%          | ≤0.001 |
| <65yr                             | 20 | 0.77 (0.69, 0.87)    | ≤0.001 | 0.79 (0.74, 0.84)   | ≤0.001 | 67.6%          | ≤0.001 |
| ≥65yr                             | 15 | 0.76 (0.67, 0.84)    | ≤0.001 | 0.76 (0.70, 0.82)   | ≤0.001 | 38.1%          | 0.067  |
| ≥65 to <75yr                      | 5  | 0.64 (0.54, 0.77)    | ≤0.001 | 0.64 (0.54, 0.77)   | ≤0.001 | 0.0%           | 0.615  |
| ≥75yr                             | 6  | 0.88 (0.53, 1.46)    | 0.616  | 0.91 (0.65, 1.26)   | 0.553  | 57.1%          | 0.040  |
| <b>Sex</b>                        | 19 | 0.74 (0.69, 0.80)    | ≤0.001 | 0.75 (0.71, 0.79)   | ≤0.001 | 52.7%          | ≤0.001 |
| Male                              | 19 | 0.74 (0.69, 0.79)    | ≤0.001 | 0.74 (0.70, 0.79)   | ≤0.001 | 19.9%          | 0.216  |
| Female                            | 19 | 0.75 (0.63, 0.88)    | ≤0.001 | 0.77 (0.70, 0.84)   | ≤0.001 | 67.5%          | ≤0.001 |
| <b>ECOG</b>                       | 18 | 0.77 (0.71, 0.83)    | ≤0.001 | 0.77 (0.73, 0.81)   | ≤0.001 | 47.5%          | ≤0.001 |
| 0                                 | 18 | 0.81 (0.71, 0.93)    | 0.002  | 0.81 (0.74, 0.89)   | ≤0.001 | 52.0%          | 0.005  |
| 1                                 | 16 | 0.74 (0.68, 0.80)    | ≤0.001 | 0.75 (0.70, 0.80)   | ≤0.001 | 40.5%          | 0.047  |
| <b>Smoking</b>                    | 16 | 0.77 (0.70, 0.84)    | ≤0.001 | 0.78 (0.73, 0.82)   | ≤0.001 | 51.6%          | ≤0.001 |
| Current/Former                    | 16 | 0.75 (0.68, 0.83)    | ≤0.001 | 0.76 (0.71, 0.81)   | 0.020  | 49.6%          | 0.013  |
| Never                             | 10 | 0.81 (0.66, 1.00)    | 0.045  | 0.85 (0.75, 0.98)   | ≤0.001 | 53.6%          | 0.022  |
| <b>Line</b>                       | 36 | 0.76 (0.71, 0.82)    | ≤0.001 | 0.77 (0.74, 0.80)   | ≤0.001 | 66.7%          | ≤0.001 |
| First-line                        | 14 | 0.72 (0.62, 0.84)    | ≤0.001 | 0.75 (0.70, 0.80)   | ≤0.001 | 77.5%          | ≤0.001 |
| Subsequent line                   | 22 | 0.78 (0.73, 0.85)    | ≤0.001 | 0.78 (0.74, 0.82)   | ≤0.001 | 54.8%          | ≤0.001 |
| <b>Masking</b>                    | 36 | 0.76 (0.71, 0.82)    | ≤0.001 | 0.77 (0.74, 0.80)   | ≤0.001 | 66.7%          | ≤0.001 |
| Double-blind                      | 9  | 0.64 (0.56, 0.74)    | ≤0.001 | 0.65 (0.60, 0.71)   | ≤0.001 | 61.3%          | 0.008  |
| Open-label                        | 27 | 0.81 (0.75, 0.87)    | ≤0.001 | 0.81 (0.77, 0.84)   | ≤0.001 | 60.0%          | ≤0.001 |
| <b>Target spot</b>                | 36 | 0.76 (0.71, 0.82)    | ≤0.001 | 0.77 (0.74, 0.80)   | ≤0.001 | 66.7%          | ≤0.001 |
| PD-L1                             | 13 | 0.86 (0.80, 0.92)    | ≤0.001 | 0.86 (0.81, 0.91)   | ≤0.001 | 26.8%          | 0.174  |
| PD-1                              | 23 | 0.71 (0.64, 0.78)    | ≤0.001 | 0.71 (0.68, 0.75)   | ≤0.001 | 68.1%          | ≤0.001 |
| <b>Anti-PD-1/PD-L1 inhibitor</b>  | 35 | 0.76 (0.71, 0.82)    | ≤0.001 | 0.77 (0.74, 0.80)   | ≤0.001 | 67.5%          | ≤0.001 |
| Atezolizumab                      | 9  | 0.84 (0.78, 0.91)    | ≤0.001 | 0.84 (0.78, 0.90)   | ≤0.001 | 11.6%          | 0.338  |
| Pembrolizumab                     | 15 | 0.70 (0.63, 0.79)    | ≤0.001 | 0.71 (0.67, 0.76)   | ≤0.001 | 60.2%          | ≤0.001 |
| Nivolumab                         | 8  | 0.71 (0.59, 0.86)    | ≤0.001 | 0.72 (0.66, 0.79)   | ≤0.001 | 79.3%          | ≤0.001 |
| Avelumab                          | 3  | 0.94 (0.79, 1.12)    | 0.484  | 0.94 (0.83, 1.08)   | 0.387  | 40.0%          | 0.189  |
| <b>CNS Metastasis</b>             | 6  | 0.71 (0.61, 0.82)    | ≤0.001 | 0.73 (0.67, 0.79)   | ≤0.001 | 56.5%          | 0.011  |
| Yes                               | 5  | 0.78 (0.48, 1.25)    | 0.303  | 0.73 (0.57, 0.94)   | 0.016  | 70.0%          | 0.010  |
| No                                | 6  | 0.70 (0.61, 0.80)    | ≤0.001 | 0.73 (0.67, 0.80)   | ≤0.001 | 48.3%          | 0.085  |
| <b>Liver Metastasis</b>           | 4  | 0.75 (0.68, 0.83)    | ≤0.001 | 0.75 (0.68, 0.83)   | ≤0.001 | 0.0%           | 0.564  |
| Yes                               | 4  | 0.81 (0.68, 0.96)    | 0.017  | 0.81 (0.68, 0.96)   | 0.017  | 0.0%           | 0.854  |
| No                                | 4  | 0.71 (0.62, 0.82)    | ≤0.001 | 0.72 (0.64, 0.82)   | ≤0.001 | 22.1%          | 0.278  |
| <b>RAS</b>                        | 4  | 0.95 (0.81, 1.11)    | 0.498  | 0.95 (0.81, 1.11)   | 0.498  | 0.0%           | 0.547  |
| Mutant                            | 4  | 0.87 (0.63, 1.21)    | 0.408  | 0.89 (0.69, 1.14)   | 0.346  | 40.0%          | 0.172  |
| Wildtype                          | 4  | 0.99 (0.81, 1.20)    | 0.900  | 0.99 (0.81, 1.20)   | 0.900  | 0.0%           | 0.920  |
| <b>EGFR</b>                       | 4  | 0.74 (0.65, 0.86)    | ≤0.001 | 0.73 (0.66, 0.80)   | ≤0.001 | 38.6%          | 0.135  |
| Mutant                            | 3  | 1.11 (0.80, 1.52)    | 0.538  | 1.11 (0.80, 1.52)   | 0.538  | 0.0%           | 0.744  |
| Wildtype                          | 4  | 0.70 (0.63, 0.77)    | ≤0.001 | 0.70 (0.63, 0.77)   | ≤0.001 | 0.0%           | 0.575  |

**Abbreviations:** NSCLC, Non-Small Cell Lung Cancer; SCLC, Small Cell Lung Cancer; Mm, Melanoma; RCC, Renal-Cell Carcinoma; UC, Urothelial Carcinoma; GC/GEJC, Gastric or Gastro-oesophageal Junction Cancer; BC, Breast Cancer; HNC, Head-and-Neck Cancer, MM, Multiple Myeloma.



**Supplementary Table 3-** Subgroup analysis: Subgroup analysis of pooled hazard ratios and 95%CI of PFS for patients with advanced or metastatic cancer assigned to intervention treatment, compared with those assigned to control treatment.

| Analysis                          | N   | Random-effects model |          | Fixed-effects model |          | Heterogeneity         |           |
|-----------------------------------|-----|----------------------|----------|---------------------|----------|-----------------------|-----------|
|                                   |     | HR (95% CI)          | <i>P</i> | HR (95% CI)         | <i>P</i> | <i>I</i> <sup>2</sup> | <i>Ph</i> |
| <b>Histotype</b>                  | 35  | 0.81 (0.73, 0.90)    | ≤0.001   | 0.82 (0.79, 0.85)   | ≤0.001   | 88.6%                 | ≤0.001    |
| HNC                               | 2   | 0.93 (0.80, 1.08)    | 0.357    | 0.93 (0.80, 1.08)   | 0.357    | 0.0%                  | 0.629     |
| GC/GEJC                           | 2   | 1.02 (0.36, 2.87)    | 0.973    | 0.99 (0.85, 1.15)   | 0.869    | 97.8%                 | ≤0.001    |
| UC                                | 2   | 0.97 (0.85, 1.11)    | 0.660    | 0.97 (0.85, 1.11)   | 0.660    | 0.0%                  | 0.882     |
| NSCLC                             | 16  | 0.75 (0.65, 0.87)    | ≤0.001   | 0.81 (0.77, 0.85)   | ≤0.001   | 89.3%                 | ≤0.001    |
| MM                                | 2   | 1.44 (1.05, 1.97)    | 0.026    | 1.44 (1.05, 1.97)   | 0.026    | 0.0%                  | 0.127     |
| Mm                                | 5   | 0.60 (0.43, 0.83)    | 0.002    | 0.56 (0.49, 0.63)   | ≤0.001   | 83.0%                 | ≤0.001    |
| RCC                               | 4   | 0.78 (0.69, 0.88)    | ≤0.001   | 0.79 (0.72, 0.86)   | ≤0.001   | 47.3%                 | 0.127     |
| CRC                               | 2   | 1.31 (1.05, 1.62)    | 0.014    | 1.31 (1.05, 1.62)   | 0.014    | 0.0%                  | 0.632     |
| <b>Regimen</b>                    | 37  | 0.81 (0.73, 0.89)    | ≤0.001   | 0.82 (0.79, 0.85)   | ≤0.001   | 88.0%                 | ≤0.001    |
| Combination therapy               | 13  | 0.75 (0.65, 0.86)    | ≤0.001   | 0.72 (0.68, 0.76)   | ≤0.001   | 80.4%                 | ≤0.001    |
| Monotherapy                       | 24  | 0.84 (0.74, 0.95)    | 0.007    | 0.87 (0.84, 0.91)   | ≤0.001   | 89.0%                 | ≤0.001    |
| <b>Combination Drug</b>           | 12  | 0.76 (0.66, 0.89)    | ≤0.001   | 0.74 (0.69, 0.78)   | ≤0.001   | 80.6%                 | ≤0.001    |
| Chemotherapy                      | 6   | 0.64 (0.55, 0.76)    | ≤0.001   | 0.67 (0.62, 0.72)   | ≤0.001   | 70.9%                 | 0.004     |
| Targeted therapy                  | 6   | 0.94 (0.74, 1.19)    | 0.602    | 0.84 (0.76, 0.92)   | ≤0.001   | 81.2%                 | ≤0.001    |
| <b>Treatment in control group</b> | 34  | 0.81 (0.73, 0.90)    | ≤0.001   | 0.82 (0.80, 0.85)   | ≤0.001   | 88.4%                 | ≤0.001    |
| Chemotherapy                      | 24  | 0.79 (0.69, 0.90)    | ≤0.001   | 0.84 (0.80, 0.87)   | ≤0.001   | 89.5%                 | ≤0.001    |
| Placebo                           | 2   | 0.55 (0.47, 0.65)    | ≤0.001   | 0.55 (0.48, 0.64)   | ≤0.001   | 9.9%                  | 0.292     |
| Biologics                         | 8   | 0.97 (0.80, 1.17)    | 0.730    | 0.87 (0.81, 0.95)   | ≤0.001   | 79.9%                 | ≤0.001    |
| <b>Age</b>                        | 163 | 0.83 (0.73, 0.95)    | 0.006    | 0.82 (0.77, 0.87)   | ≤0.001   | 78.0%                 | ≤0.001    |
| <65yr                             | 13  | 0.82 (0.67, 1.02)    | 0.078    | 0.81 (0.75, 0.88)   | ≤0.001   | 86.3%                 | ≤0.001    |
| ≥65yr                             | 11  | 0.84 (0.69, 1.01)    | 0.067    | 0.83 (0.75, 0.92)   | ≤0.001   | 69.9%                 | ≤0.001    |
| ≥65 to <75yr                      | 2   | 0.71 (0.39, 1.29)    | 0.264    | 0.78 (0.61, 1.01)   | 0.063    | 78.1%                 | 0.033     |
| ≥75yr                             | 3   | 0.98 (0.52, 1.85)    | 0.956    | 0.99 (0.63, 1.56)   | 0.971    | 46.4%                 | 0.155     |
| <b>Sex</b>                        | 11  | 0.78 (0.67, 0.92)    | 0.002    | 0.79 (0.74, 0.84)   | ≤0.001   | 83.1%                 | ≤0.001    |
| Male                              | 11  | 0.75 (0.63, 0.90)    | 0.002    | 0.76 (0.71, 0.82)   | ≤0.001   | 80.2%                 | ≤0.001    |
| Female                            | 11  | 0.82 (0.61, 1.11)    | 0.196    | 0.83 (0.75, 0.93)   | ≤0.001   | 86.2%                 | ≤0.001    |
| <b>ECOG</b>                       | 12  | 0.84 (0.71, 0.99)    | 0.036    | 0.81 (0.76, 0.86)   | ≤0.001   | 83.7%                 | ≤0.001    |
| 0                                 | 12  | 0.91 (0.67, 1.22)    | 0.530    | 0.90 (0.81, 1.00)   | 0.047    | 86.7%                 | ≤0.001    |
| 1                                 | 11  | 0.77 (0.64, 0.93)    | 0.005    | 0.76 (0.70, 0.83)   | ≤0.001   | 78.7%                 | ≤0.001    |
| <b>Smoking</b>                    | 8   | 0.79 (0.63, 0.97)    | 0.027    | 0.75 (0.68, 0.82)   | ≤0.001   | 78.5%                 | ≤0.001    |
| Current/Former                    | 8   | 0.72 (0.57, 0.89)    | 0.003    | 0.72 (0.65, 0.79)   | ≤0.001   | 77.4%                 | ≤0.001    |
| Never                             | 5   | 1.00 (0.55, 1.79)    | 0.991    | 0.90 (0.73, 1.12)   | 0.352    | 81.2%                 | ≤0.001    |
| <b>Line</b>                       | 37  | 0.81 (0.73, 0.89)    | ≤0.001   | 0.82 (0.79, 0.85)   | ≤0.001   | 88.0%                 | ≤0.001    |
| First-line                        | 15  | 0.70 (0.60, 0.81)    | ≤0.001   | 0.74 (0.70, 0.78)   | ≤0.001   | 88.0%                 | ≤0.001    |
| Subsequent line                   | 22  | 0.89 (0.79, 1.01)    | 0.081    | 0.89 (0.85, 0.93)   | ≤0.001   | 86.4%                 | ≤0.001    |
| <b>Masking</b>                    | 37  | 0.81 (0.73, 0.89)    | ≤0.001   | 0.82 (0.79, 0.85)   | ≤0.001   | 88.0%                 | ≤0.001    |
| Double-blind                      | 9   | 0.57 (0.49, 0.67)    | ≤0.001   | 0.60 (0.56, 0.64)   | ≤0.001   | 78.7%                 | ≤0.001    |
| Open-label                        | 28  | 0.91 (0.82, 1.00)    | 0.054    | 0.90 (0.87, 0.94)   | ≤0.001   | 82.7%                 | ≤0.001    |
| <b>Target spot</b>                | 37  | 0.81 (0.73, 0.89)    | ≤0.001   | 0.82 (0.79, 0.85)   | ≤0.001   | 88.0%                 | ≤0.001    |
| PD-L1                             | 13  | 0.88 (0.75, 1.04)    | 0.143    | 0.85 (0.81, 0.89)   | ≤0.001   | 90.1%                 | ≤0.001    |
| PD-1                              | 24  | 0.77 (0.68, 0.87)    | ≤0.001   | 0.80 (0.76, 0.83)   | ≤0.001   | 86.8%                 | ≤0.001    |
| <b>Anti-PD-1/PD-L1 inhibitor</b>  | 36  | 0.82 (0.74, 0.90)    | ≤0.001   | 0.83 (0.80, 0.86)   | ≤0.001   | 87.5%                 | ≤0.001    |
| Atezolizumab                      | 9   | 0.86 (0.74, 1.00)    | 0.045    | 0.83 (0.78, 0.88)   | ≤0.001   | 82.5%                 | ≤0.001    |
| Pembrolizumab                     | 15  | 0.76 (0.65, 0.89)    | ≤0.001   | 0.80 (0.75, 0.84)   | ≤0.001   | 87.8%                 | ≤0.001    |
| Nivolumab                         | 9   | 0.78 (0.63, 0.98)    | 0.029    | 0.80 (0.75, 0.87)   | ≤0.001   | 86.7%                 | ≤0.001    |
| Avelumab                          | 3   | 1.11 (0.68, 1.83)    | 0.675    | 1.09 (0.97, 1.22)   | 0.163    | 94.4%                 | ≤0.001    |
| <b>CNS Metastasis</b>             | 5   | 0.65 (0.54, 0.80)    | ≤0.001   | 0.68 (0.62, 0.75)   | ≤0.001   | 66.9%                 | 0.002     |
| Yes                               | 4   | 0.64 (0.42, 0.97)    | 0.036    | 0.62 (0.46, 0.84)   | 0.002    | 41.0%                 | 0.166     |
| No                                | 5   | 0.66 (0.52, 0.83)    | ≤0.001   | 0.69 (0.62, 0.77)   | ≤0.001   | 78.6%                 | ≤0.001    |
| <b>RAS</b>                        | 3   | 1.27 (1.06, 1.51)    | 0.008    | 1.27 (1.06, 1.51)   | 0.008    | 0.0%                  | 0.423     |
| Mutant                            | 3   | 1.09 (0.82, 1.43)    | 0.563    | 1.09 (0.84, 1.41)   | 0.532    | 11.0%                 | 0.325     |
| Wildtype                          | 3   | 1.45 (1.14, 1.84)    | 0.002    | 1.45 (1.14, 1.84)   | 0.002    | 0.0%                  | 0.929     |
| <b>EGFR</b>                       | 2   | 1.02 (0.77, 1.36)    | 0.881    | 0.89 (0.78, 1.01)   | 0.070    | 68.6%                 | 0.023     |
| Mutant                            | 2   | 1.57 (1.07, 2.31)    | 0.022    | 1.57 (1.07, 2.31)   | 0.022    | 0.0%                  | 0.621     |
| Wildtype                          | 2   | 0.83 (0.73, 0.95)    | 0.007    | 0.83 (0.73, 0.95)   | 0.007    | 0.0%                  | 1.000     |

**Abbreviations:** NSCLC, Non-Small Cell Lung Cancer; SCLC, Small Cell Lung Cancer; Mm, Melanoma; RCC, Renal-Cell Carcinoma; UC, Urothelial Carcinoma; GC/GEJC, Gastric or Gastro-oesophageal Junction Cancer; BC, Breast Cancer; HNC, Head-and-Neck Cancer, MM, Multiple Myeloma.

**Supplementary Figure 1- Risk of bias graph: Review authors' judgments about each risk of bias item presented as percentages across all included studies.**

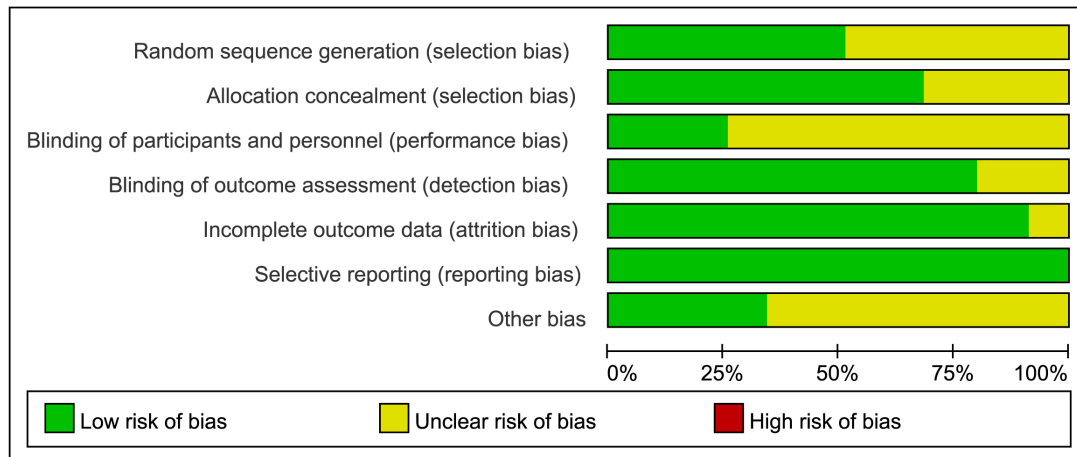

**Supplementary Figure 2-** Risk of bias summary: Review authors' judgments about each risk of bias item for each included study.

|                   | Random sequence generation (selection bias) | Allocation concealment (selection bias) | Blinding of participants and personnel (performance bias) | Blinding of outcome assessment (detection bias) | Incomplete outcome data (attrition bias) | Selective reporting (reporting bias) | Other bias |
|-------------------|---------------------------------------------|-----------------------------------------|-----------------------------------------------------------|-------------------------------------------------|------------------------------------------|--------------------------------------|------------|
| Antonia 2018      | ?                                           | +                                       | +                                                         | +                                               | +                                        | +                                    | ?          |
| Ascierto2018      | ?                                           | +                                       | +                                                         | ?                                               | +                                        | +                                    | ?          |
| Bang 2018         | +                                           | ?                                       | ?                                                         | +                                               | +                                        | +                                    | ?          |
| Barlesi 2018      | +                                           | +                                       | ?                                                         | +                                               | +                                        | +                                    | +          |
| Bellmunt 2017     | ?                                           | +                                       | ?                                                         | +                                               | +                                        | +                                    | +          |
| Borghaei 2015     | ?                                           | ?                                       | ?                                                         | +                                               | +                                        | +                                    | ?          |
| Borghaei 2019     | ?                                           | ?                                       | ?                                                         | +                                               | +                                        | +                                    | ?          |
| Brahmer 2015      | ?                                           | ?                                       | ?                                                         | +                                               | +                                        | +                                    | +          |
| Brian 2019        | +                                           | +                                       | ?                                                         | +                                               | +                                        | +                                    | ?          |
| Carbone 2017      | ?                                           | ?                                       | ?                                                         | +                                               | +                                        | +                                    | ?          |
| Cohen 2018        | +                                           | +                                       | ?                                                         | ?                                               | +                                        | +                                    | +          |
| Eng 2019          | +                                           | +                                       | ?                                                         | ?                                               | +                                        | +                                    | ?          |
| Fehrenbacher 2016 | +                                           | +                                       | ?                                                         | +                                               | +                                        | +                                    | +          |
| Fehrenbacher 2018 | ?                                           | +                                       | ?                                                         | ?                                               | +                                        | +                                    | +          |
| Ferris 2016       | ?                                           | +                                       | ?                                                         | +                                               | +                                        | +                                    | +          |
| Fradet 2019       | ?                                           | ?                                       | ?                                                         | ?                                               | +                                        | +                                    | ?          |
| Gandhi 2018       | +                                           | +                                       | +                                                         | +                                               | +                                        | +                                    | +          |
| Hamid 2017        | ?                                           | +                                       | +                                                         | ?                                               | +                                        | +                                    | ?          |
| Herbst 2016       | +                                           | +                                       | ?                                                         | +                                               | +                                        | +                                    | +          |
| Horn 2018         | +                                           | +                                       | +                                                         | +                                               | ?                                        | +                                    | +          |
| Kang 2017         | +                                           | +                                       | +                                                         | +                                               | +                                        | +                                    | ?          |
| Larkin 2018       | ?                                           | ?                                       | ?                                                         | +                                               | +                                        | +                                    | ?          |
| Mateos 2019       | +                                           | +                                       | ?                                                         | +                                               | +                                        | +                                    | ?          |
| Mok 2019          | +                                           | +                                       | ?                                                         | ?                                               | +                                        | +                                    | ?          |
| Motzer 2015       | ?                                           | ?                                       | ?                                                         | +                                               | +                                        | +                                    | ?          |
| Motzer 2019       | ?                                           | ?                                       | ?                                                         | +                                               | +                                        | +                                    | ?          |
| Paz-Ares 2018     | +                                           | +                                       | +                                                         | +                                               | ?                                        | +                                    | ?          |
| Powles 2018       | +                                           | +                                       | +                                                         | +                                               | +                                        | +                                    | ?          |
| Reck 2016         | ?                                           | +                                       | ?                                                         | +                                               | +                                        | +                                    | +          |
| Rini 2019         | ?                                           | ?                                       | ?                                                         | +                                               | +                                        | +                                    | ?          |
| Schmid 2018       | +                                           | +                                       | +                                                         | +                                               | +                                        | +                                    | ?          |
| Socinski 2018     | ?                                           | ?                                       | ?                                                         | +                                               | +                                        | +                                    | +          |
| Usmani 2019       | +                                           | +                                       | ?                                                         | +                                               | +                                        | +                                    | ?          |
| Weber 2015        | +                                           | +                                       | ?                                                         | +                                               | +                                        | +                                    | ?          |
| West 2019         | +                                           | +                                       | ?                                                         | +                                               | ?                                        | +                                    | ?          |

**Supplementary Figure 3- PD-L1 biomarker analysis: Analysis of PD-L1 expression pooled hazard ratios and 95%CI of OS with cut-off of 1% (A) and 50% (B) for patients with advanced or metastatic cancer assigned to intervention treatment, compared with those assigned to control treatment.**

**A**

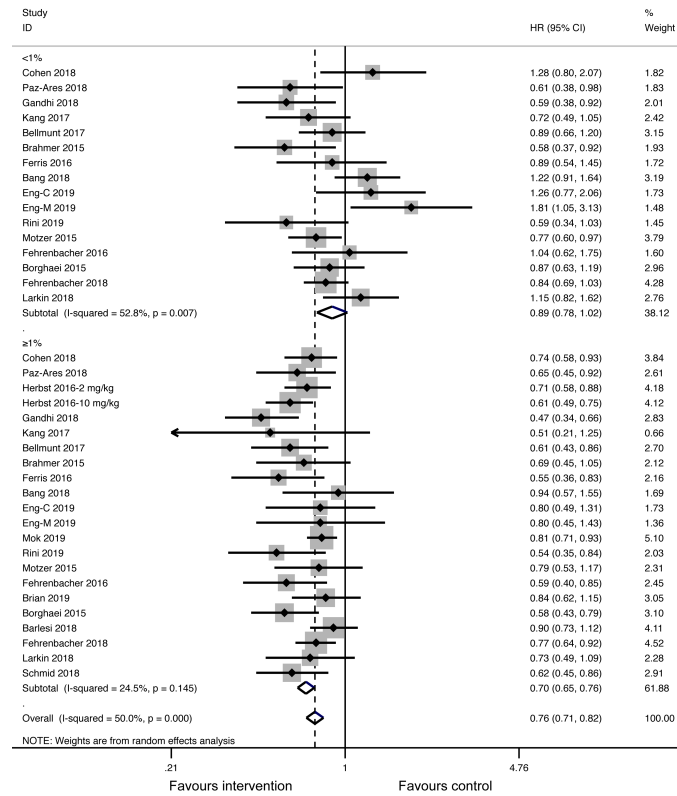

**B**

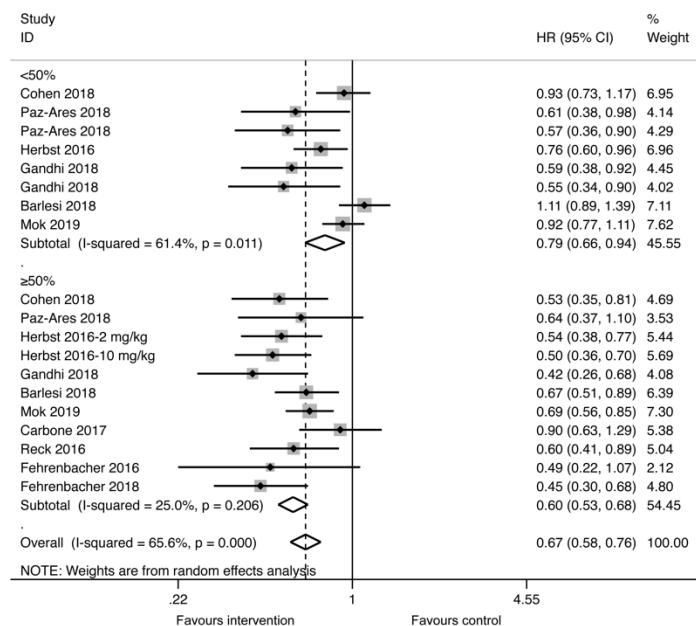

**Supplementary Figure 4- PD-L1 biomarker analysis: Analysis of PD-L1 expression pooled hazard ratios and 95%CI of PFS with cut-off of 1% (A) and 50% (B) for patients with advanced or metastatic cancer assigned to intervention treatment, compared with those assigned to control treatment.**

**A**

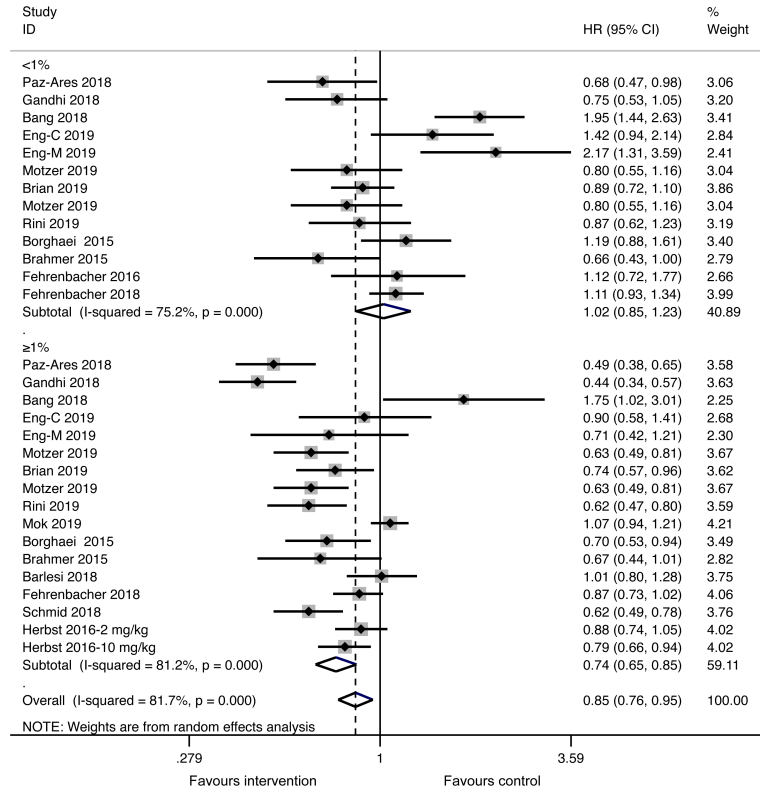

**B**

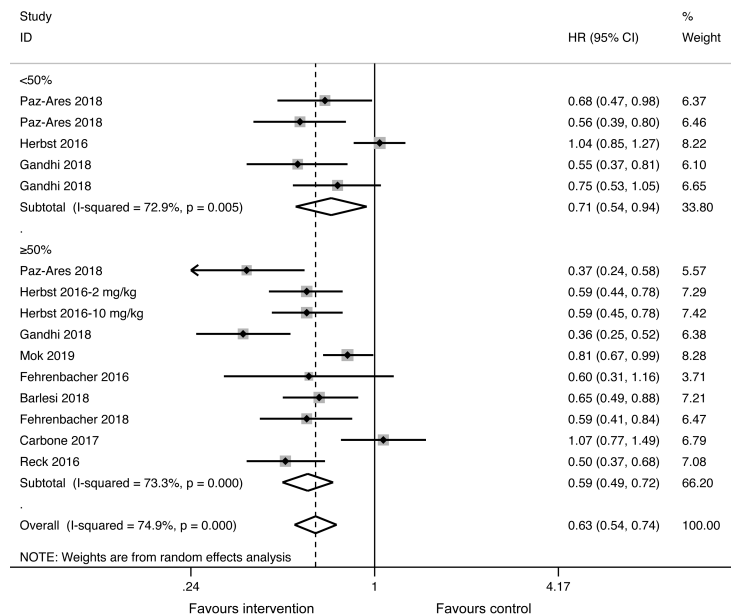

**Supplementary Figure 5- ORR analysis: Analysis of ORR pooled relative ratios and 95%CI for patients with advanced or metastatic cancer who received anti-PD-1/PD-L1 inhibitors compared to control therapies based on anti-PD-1/PD- L1 inhibitor used (A) and target spot (B).**

**A**

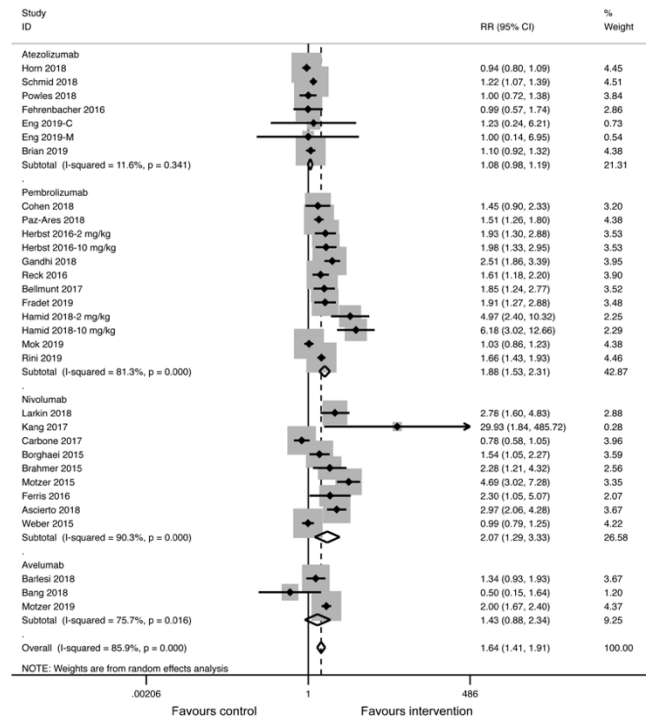

**B**

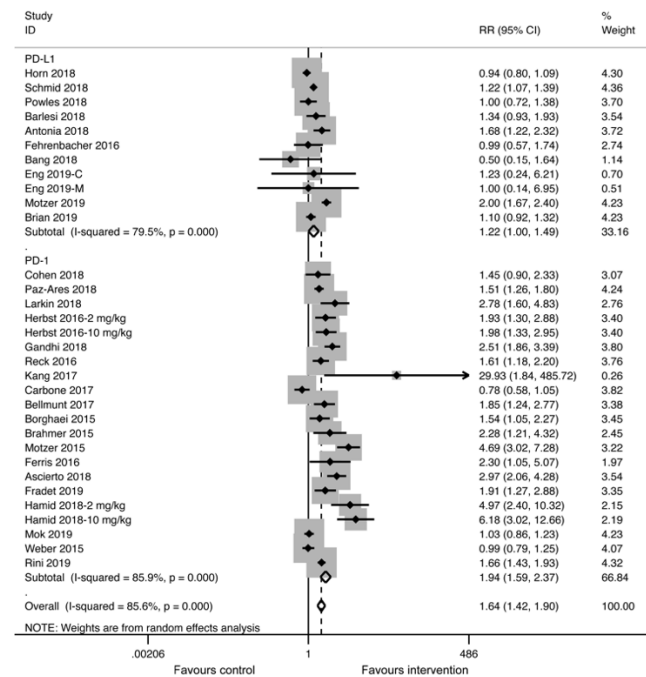

**Supplementary Figure 6- ORR analysis: Meta-regression analysis of ORR for patients with advanced or metastatic cancer who received anti-PD-1/PD-L1 inhibitors compared to control therapies based on regimen used (A) and target spot (B).**

**A**

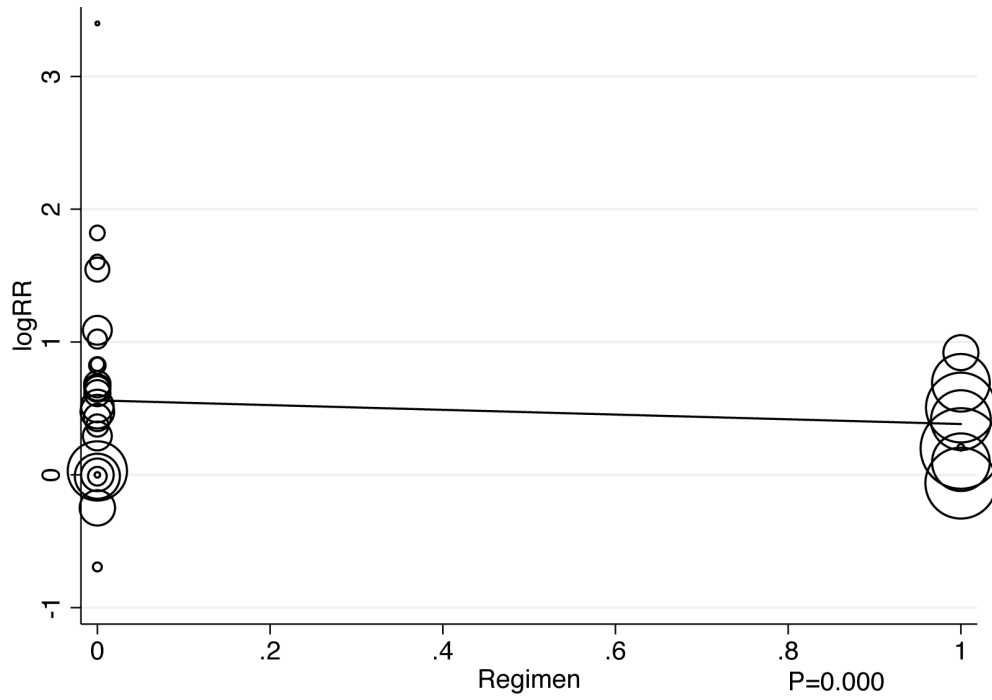

**B**

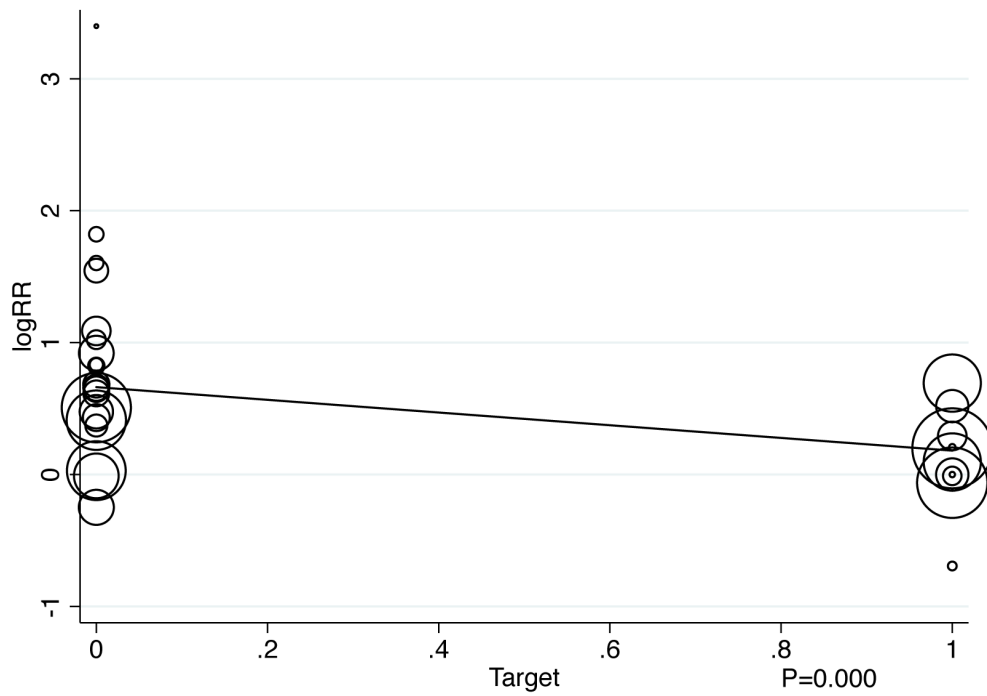



**Supplementary Figure 7- Sensitivity analysis: Sensitivity analysis of OS (A) and PFS (B) in included RCTs for the robustness of findings to different aspects of the trials methodology.**

**A**

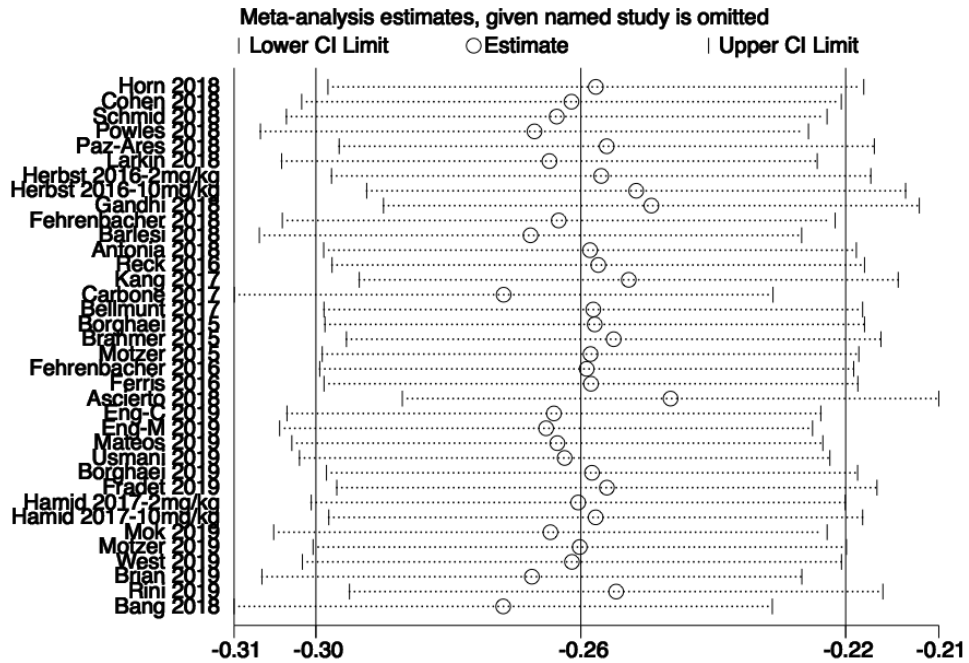

**B**

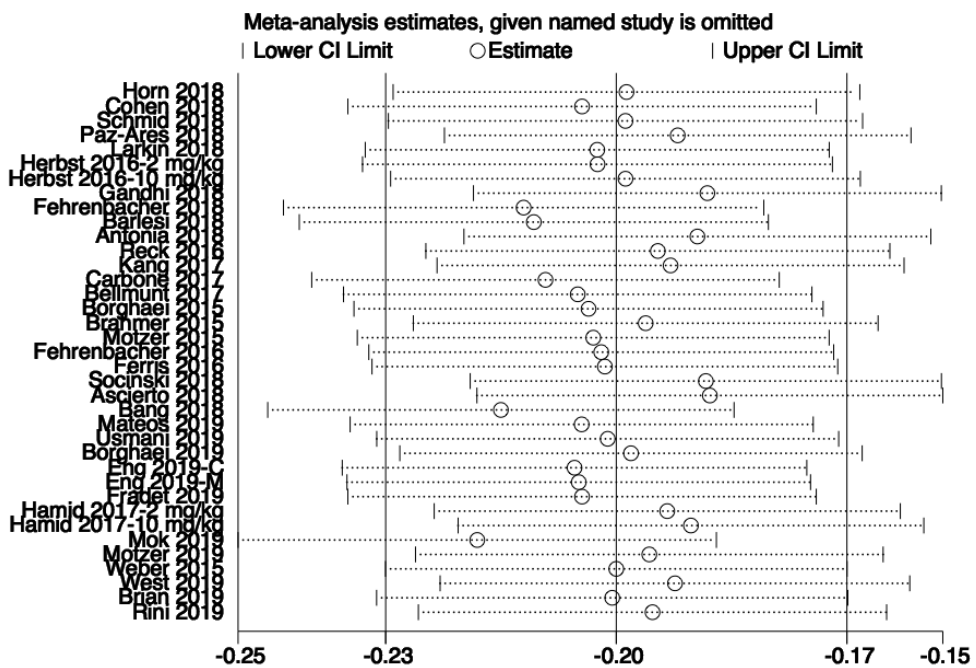

**Supplementary Figure 8-** Funnel plot: Funnel plot of OS (A) and PFS (B) from included RCTs for the visual detection of systematic publication bias and small study effect.

**A**

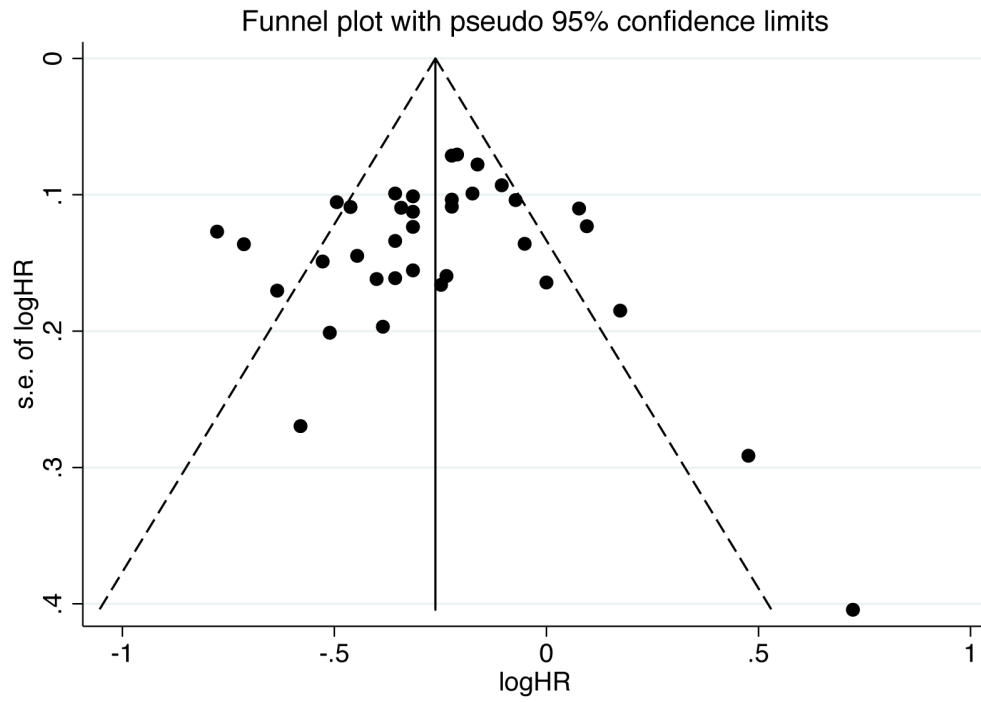

**B**

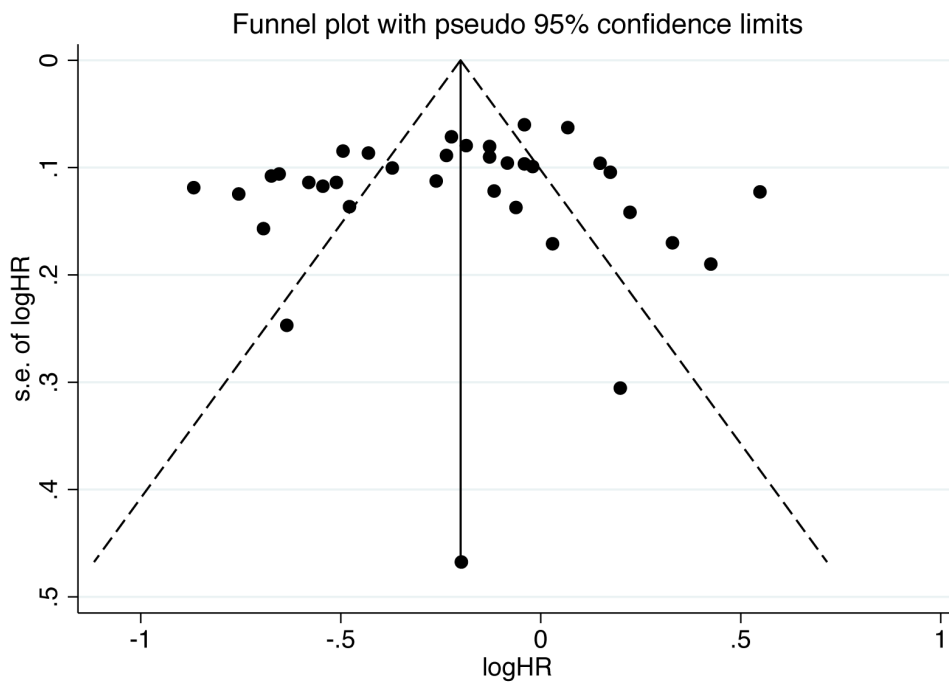

**Supplementary Figure 9-** Egger's test: Egger's test of OS (A) and PFS (B) from included RCTs for calculative detection of association between the study effects and the study size.

**A**

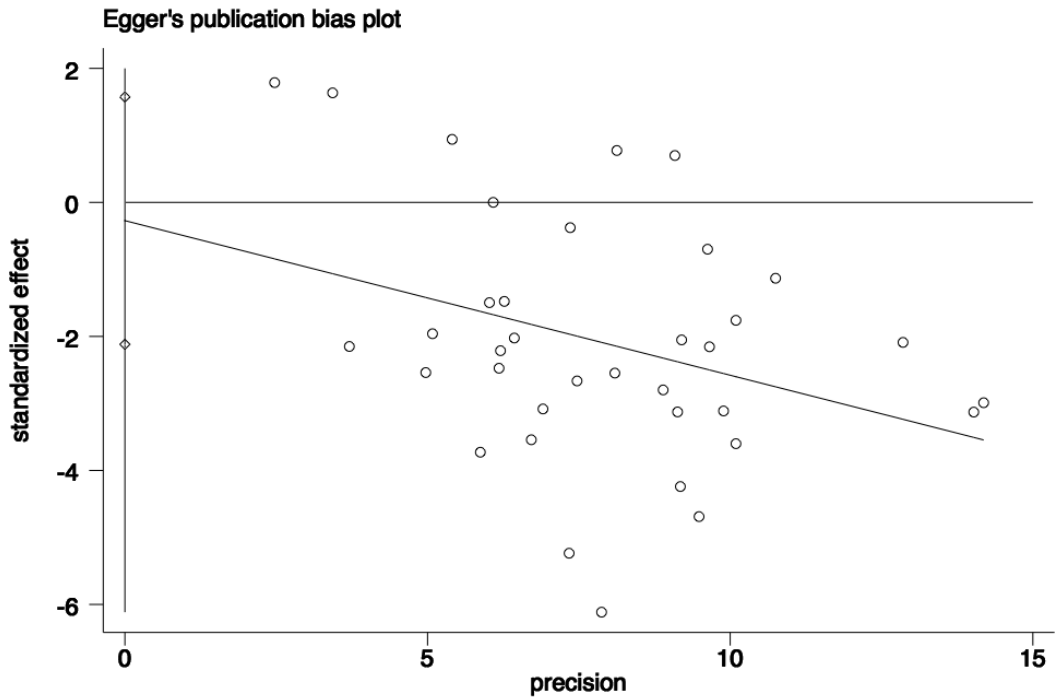

**B**

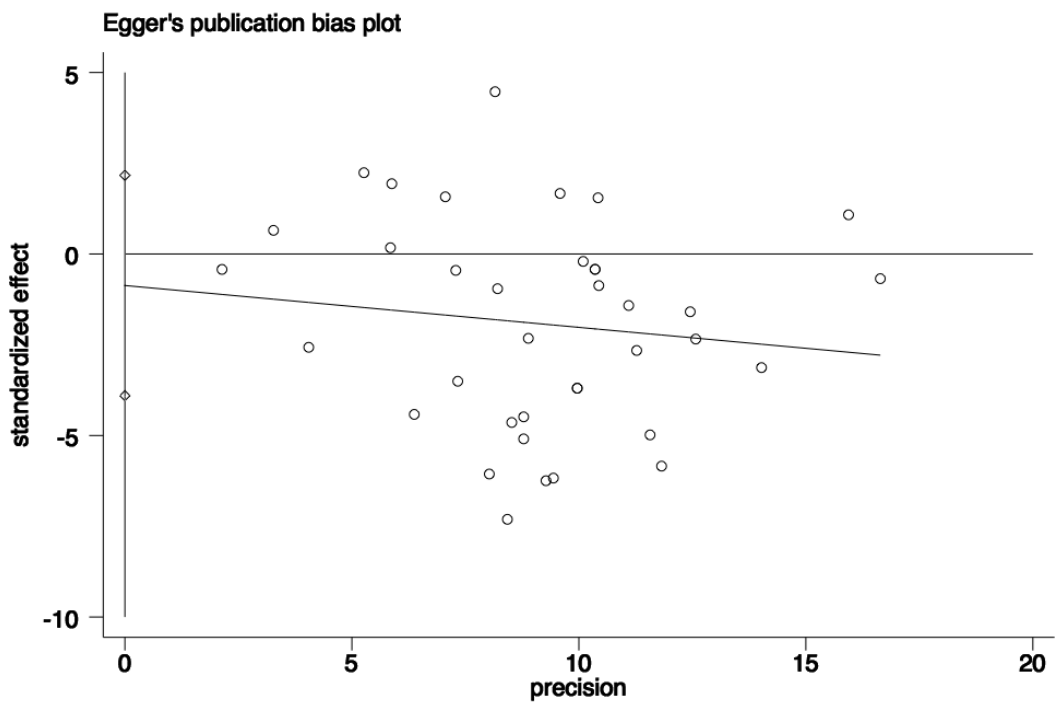

**Supplementary Figure 10-** Begg's test: Begg's test of OS (A) and PFS (B) from included RCTs for calculative detection of association between the study effects and the study size.

**A**

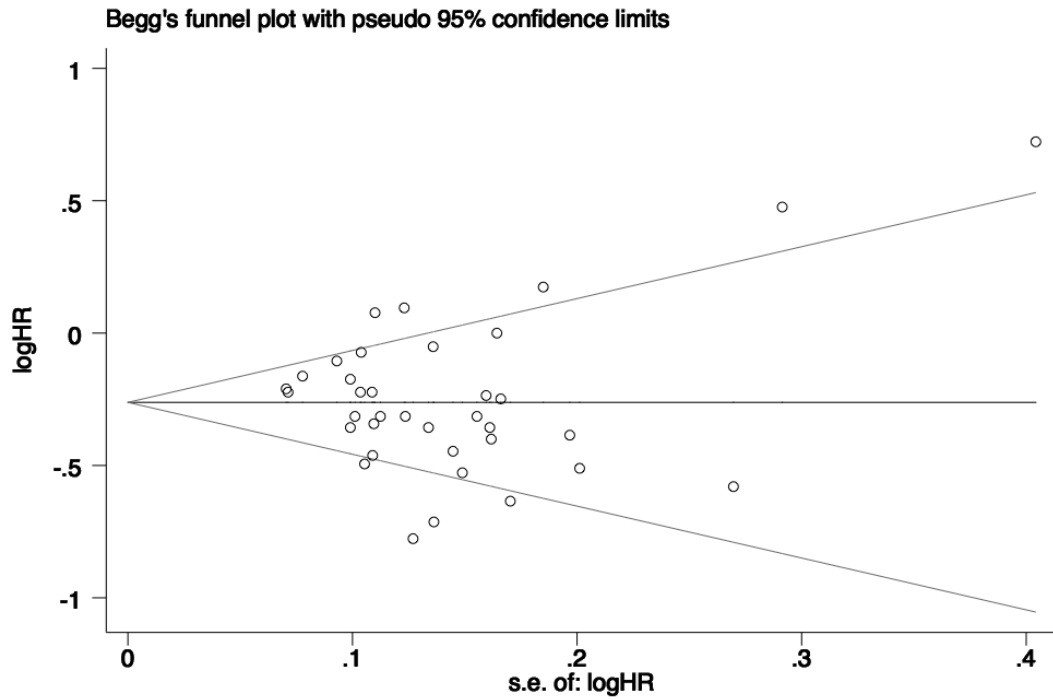

**B**

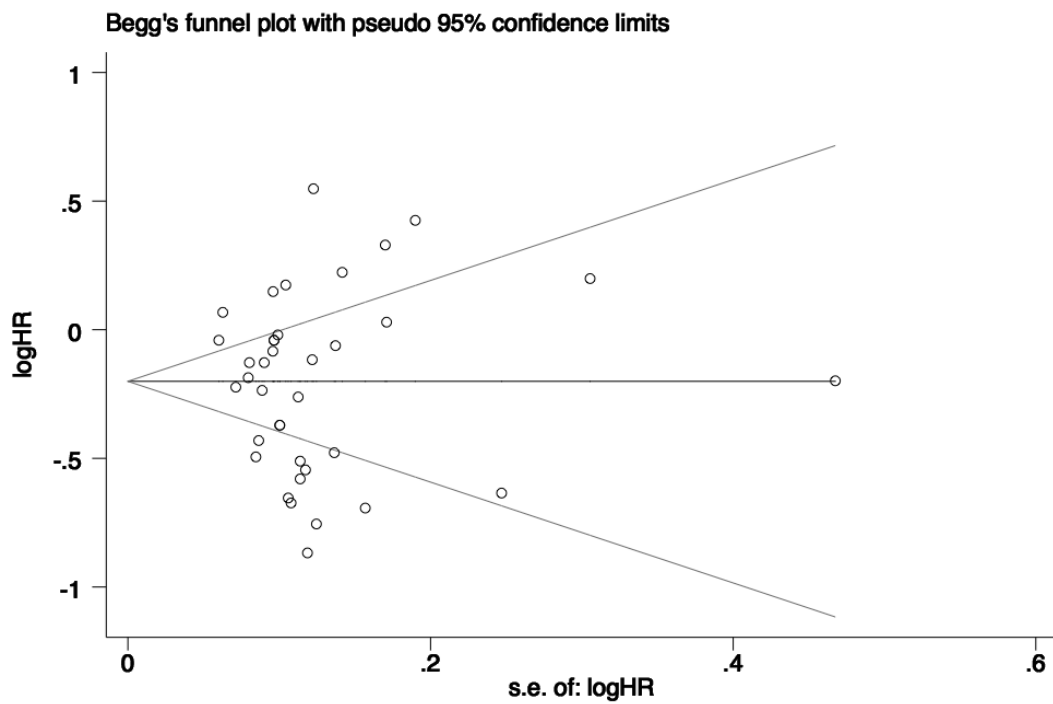

Supplement: 41598_2020_58674_MOESM1_ESM.pdf [file 41598_2020_58674_MOESM1_ESM.pdf]
